# Supplementary material for: Effects of Fluoro Substitution on the Electrochromic Performance of Alternating Benzotriazole and Benzothiadiazole-Based Donor–Acceptor Type Copolymers
Source: MDPI journal article supplement (doi:10.3390/polym10010023), 2017-12-25
Supplement: s1 [file s1]

# Effects of Fluoro Substitution on the Electrochromic Performance of Alternating Benzotriazole and Benzothiadiazole-Based Donor–Acceptor Type Copolymers

Yan Zhang<sup>1,\*</sup>, Lingqian Kong<sup>2</sup>, Xiuping Ju<sup>2</sup>, Jinsheng Zhao<sup>1,\*</sup>

<sup>1</sup> Shandong Key Laboratory of Chemical Energy Storage and Novel Cell Technology, Liaocheng University, Liaocheng, 252059, China

<sup>2</sup> Dongchang College, Liaocheng University, Liaocheng, 252059, China; [lingqiankong@126.com](mailto:lingqiankong@126.com) (L.K.); [jxp1127@163.com](mailto:jxp1127@163.com) (X.J.)

\* Correspondence: [zy@lcu.edu.cn](mailto:zy@lcu.edu.cn) (Y.Z.); [j.s.zhao@163.com](mailto:j.s.zhao@163.com) (J.Z.);

Tel.: +86-635-823-9325 (Y.Z.); Tel.: +86-635-853-9607 (J.Z.)

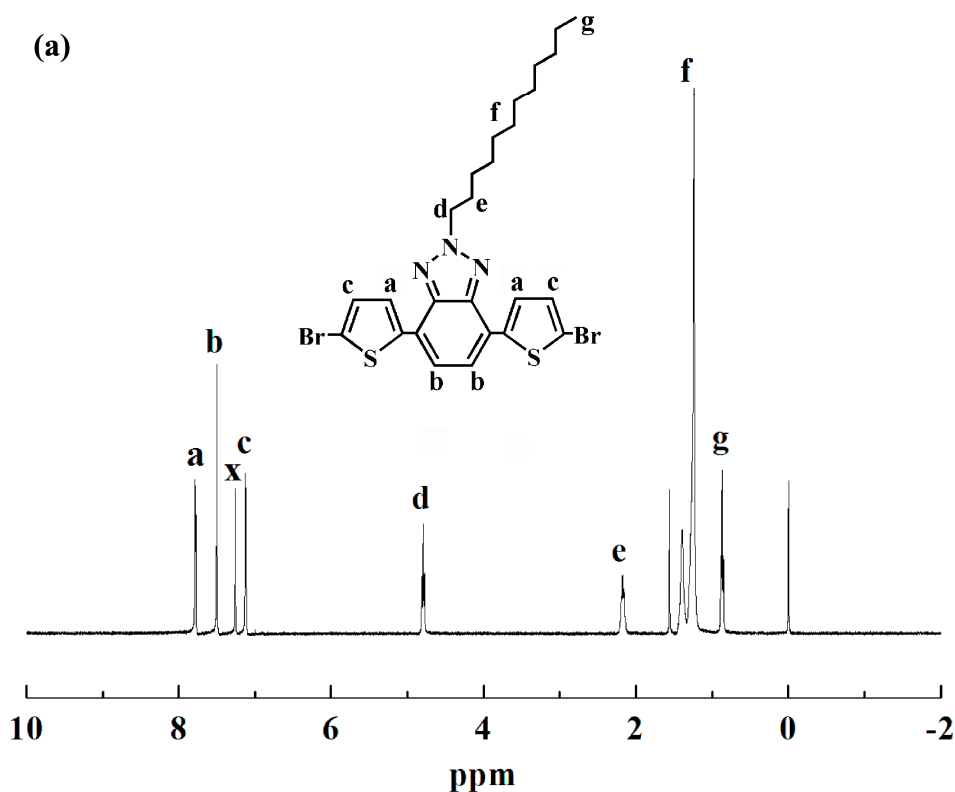

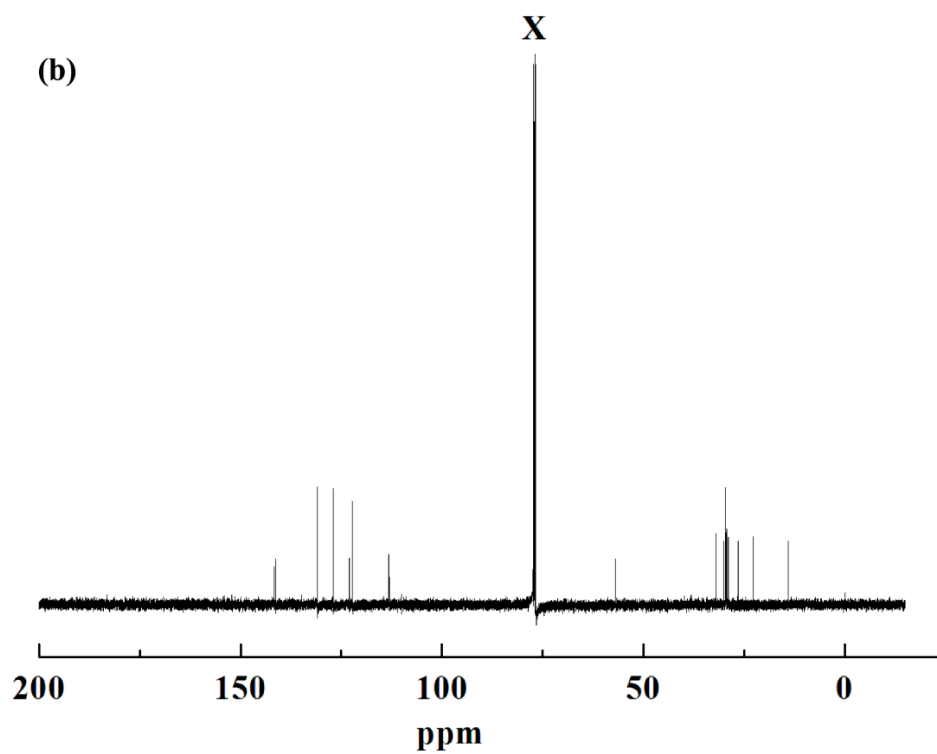

**Figure S1.**  $^1\text{H}$  NMR spectrum and  $^{13}\text{C}$  NMR spectrum of 2-dodecyl-4,7-di(5-bromo-thiophen-2-yl)-2H-benzo[d][1,2,3]triazol in  $\text{CDCl}_3$ : (a)  $^1\text{H}$  NMR, solvent peak at  $\delta = 7.26$  ppm was marked by “x”. (b)  $^{13}\text{C}$  NMR, solvent peak at  $\delta = 77.01$  ppm was marked by “X”.

(a)

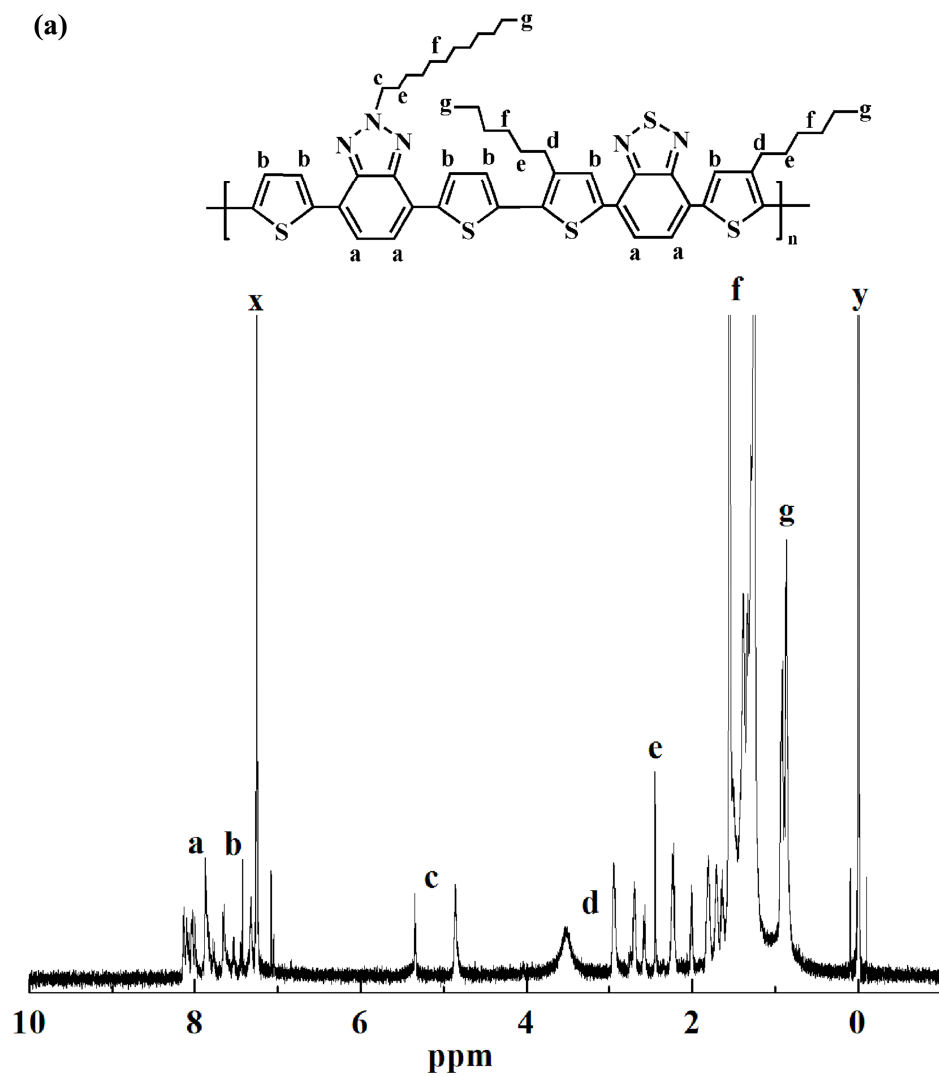

(b)

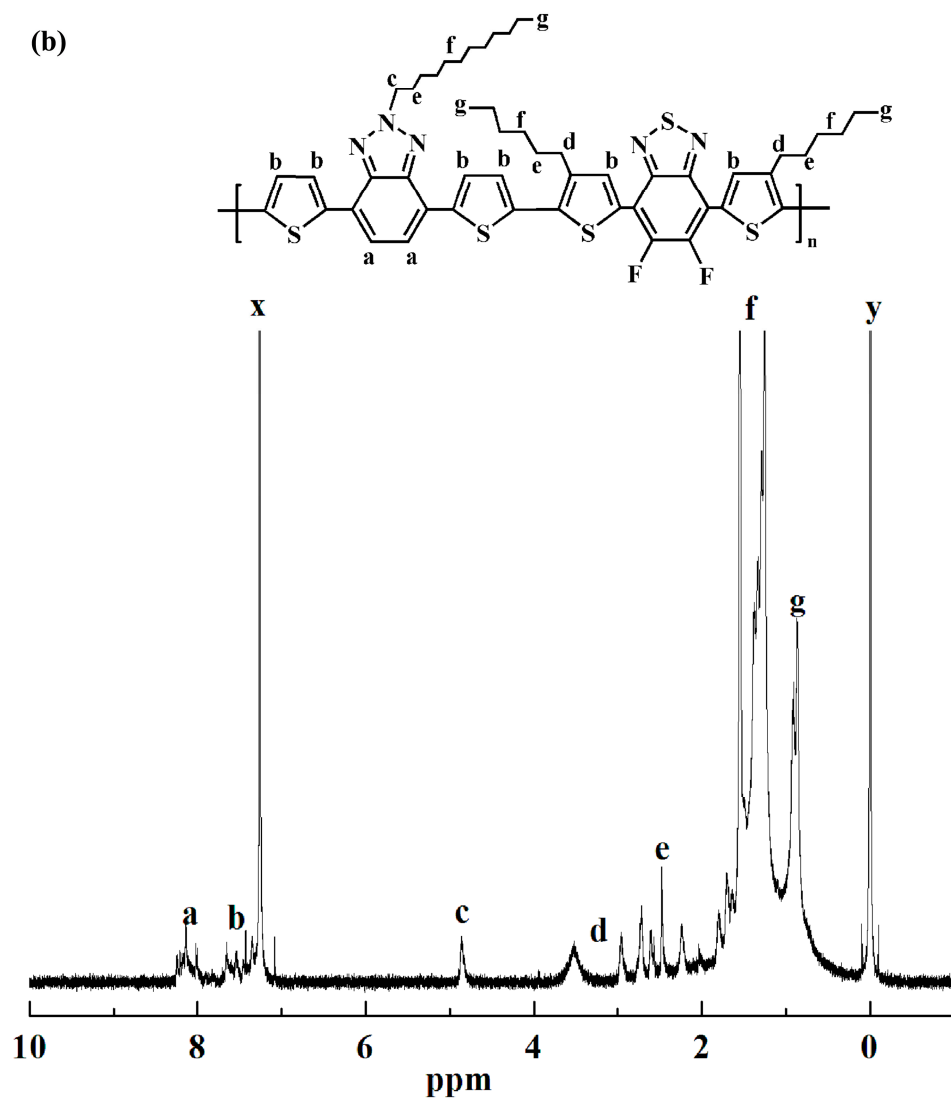

**Figure S2.**  $^1\text{H}$  NMR spectra of the polymers in  $\text{CDCl}_3$ : (a) P(TBT-TBTh); (b) P(TBT-F-TBTh).

Solvent and tetramethylsilane peaks were marked by “x”, “y” respectively.
